# Supplementary material
Source: PubMed Central journal article supplement (PMC9742294)

### H3K27M

DIPG36 parental (H3K27M)  
DIPG36 H3.1K27M KO  
G477 parental (H3 WT)

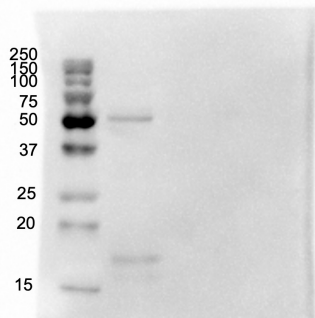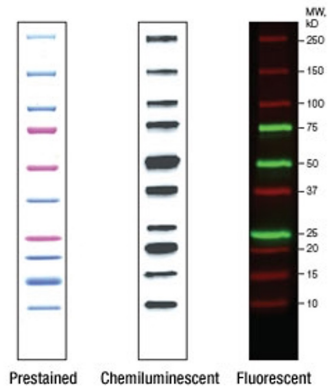

### Total H3

DIPG36 parental (H3K27M)  
DIPG36 H3.1K27M KO  
G477 parental (H3 WT)

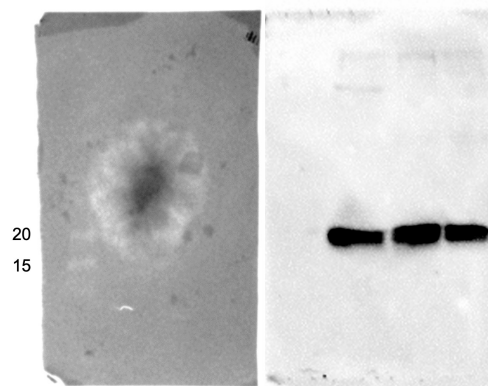

Supplement: NIHMS1842460-supplement-1842460_SD_ED_9_unprocessed_WB.pdf [file NIHMS1842460-supplement-1842460_SD_ED_9_unprocessed_WB.pdf]
